# Supplementary material
Source: publisher site journal article supplement (https://www.dovepress.com/article/535325)
Supplement: Supplementary file 1 [file 535325%20Supplementary%20Material.docx]

Supplementary Table 1: Schoenfeld Residual Test for Proportional Hazards Assumption

|  | *χ²* | df | *P* |
| --- | --- | --- | --- |
| sex | 0.026221 | 1 | 0.8714 |
| hypertension | 1.6107 | 1 | 0.2044 |
| MI | 3.15E-06 | 1 | 0.9986 |
| BMI | 0.0049705 | 1 | 0.9438 |
| HDL | 1.4828 | 1 | 0.2233 |
| HbA1c1 | 0.00033272 | 1 | 0.9854 |
| GLP-1 | 4.0532 | 1 | 0.0441 |
| GLOBAL | 9.5106 | 7 | 0.218 |

Global test *P*>0.05 indicates no significant violation of proportional hazards assumption overall
